# Supplementary material for: La1−xLnxH(O3PCH3)2 (Ln = Tb, Eu; 0 < x ≤ 1): an organic–inorganic hybrid with lanthanide chains and tunable luminescence properties
Source: Royal Society of Chemistry journal article supplement (doi:10.1039/c4dt02643h), 2014-11-05

**Supplementary materials for the manuscript :**  
***La<sub>1-x</sub>Ln<sub>x</sub>H(O<sub>3</sub>PCH<sub>3</sub>)<sub>2</sub> (Ln=Tb, Eu ; 0<x≤1) : An Organic-Inorganic Hybrid with Lanthanide Chains and Tunable Luminescent Properties.***

**TGA curve of La<sub>0.5</sub>Eu<sub>0.5</sub>H(O<sub>3</sub>PCH<sub>3</sub>)<sub>2</sub>**

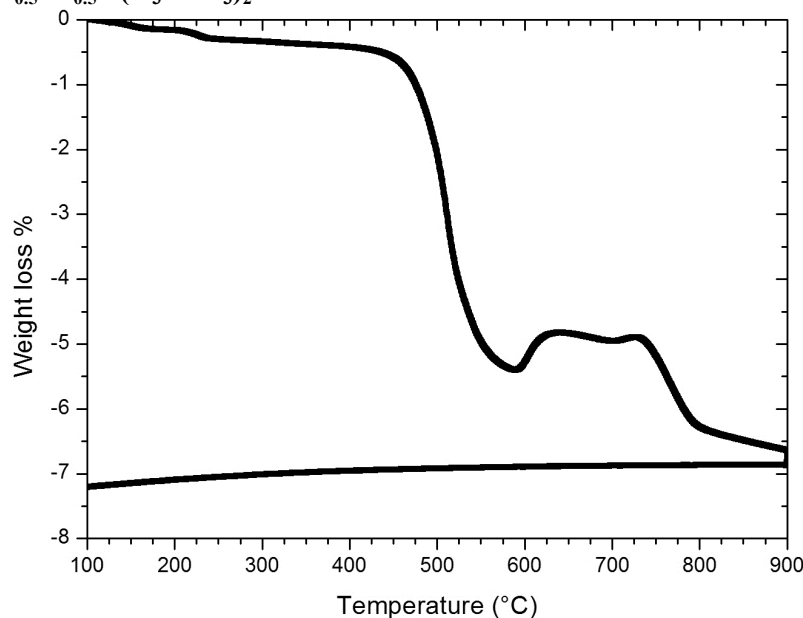

Rq : Decomposition of La<sub>0.5</sub>Eu<sub>0.5</sub>H(O<sub>3</sub>PCH<sub>3</sub>)<sub>2</sub> occurs in two steps (between 450°C and 590°C with weight loss and between 590°C and 900°C with weight gain and loss) instead of one step like found by Rosa et al. for TbH(O<sub>3</sub>PCH<sub>3</sub>)<sub>2</sub>.

**X-Ray Diffraction Powder Patterns (XRDPP) of La<sub>1-x</sub>Ln<sub>x</sub>H(O<sub>3</sub>PCH<sub>3</sub>)<sub>2</sub> (Ln = Eu, Tb)**

Experimental XRDPP of LaH(O<sub>3</sub>PCH<sub>3</sub>)<sub>2</sub> (red line), La<sub>0.5</sub>Eu<sub>0.5</sub>H(O<sub>3</sub>PCH<sub>3</sub>)<sub>2</sub> (brown line), La<sub>0.5</sub>Tb<sub>0.5</sub>H(O<sub>3</sub>PCH<sub>3</sub>)<sub>2</sub> (green line), calculated and difference XRDPP of LaH(O<sub>3</sub>PCH<sub>3</sub>)<sub>2</sub> (black and blue line respectively) and Bragg positions of LaH(O<sub>3</sub>PCH<sub>3</sub>)<sub>2</sub> (dark green bars)

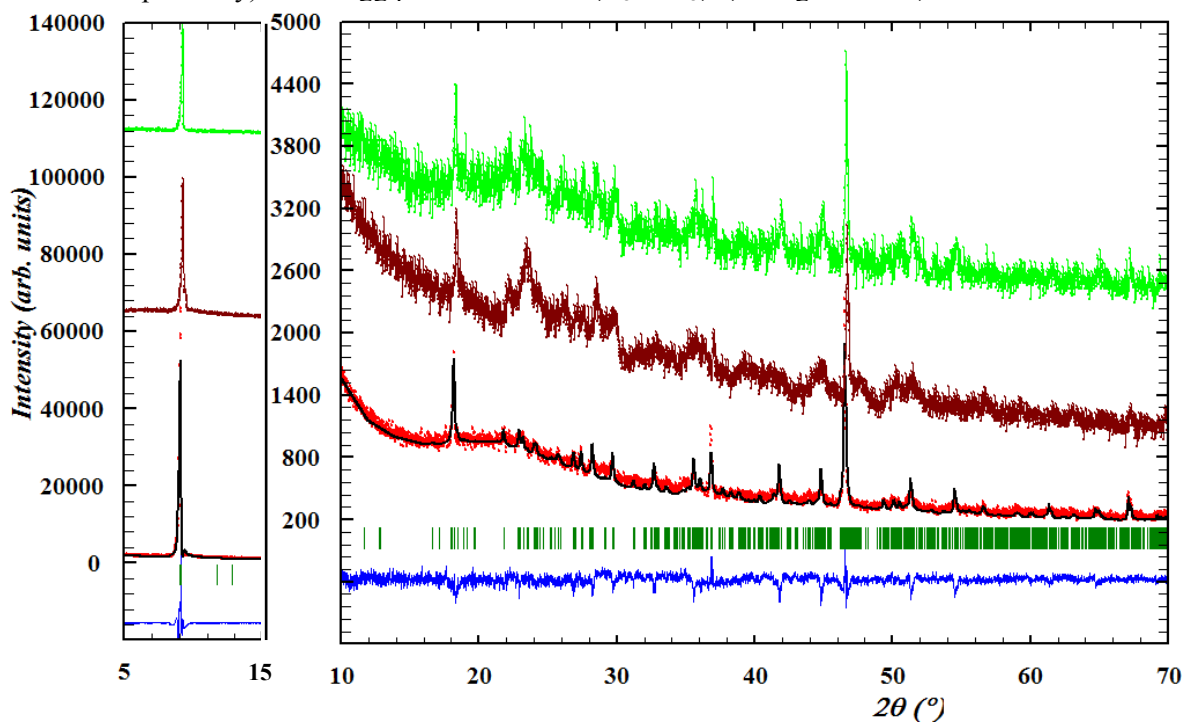

Supplement: c4dt02643h1.pdf [file c4dt02643h1.pdf]
